# Supplementary material for: A custom ddPCR method for the detection of copy number variations in the nebulin triplicate region
Source: PLoS One. 2022 May 16;17(5):e0267793. doi: 10.1371/journal.pone.0267793 (PMC9109913; doi:10.1371/journal.pone.0267793)
Supplement: S6 Table — (XLSX) [file pone.0267793.s006.xlsx]

## Sheet: Sheet1
NM- and NMD-CGH-arrays
CN	5	6	7	8	9	10	11	14	Mean %CV
n	22	44	12	3	5	7	2	3
Min	4.30903	5.70198	6.64935	7.6254	8.61119	9.64922	10.6207	13.6768
Max	5.28284	6.79872	7.00149	7.9006	9.44671	10.4448	10.9314	14.2754
Mean	5.07945	6.03378	6.84382	7.75333	8.88275	10.0177	10.7761	13.9662
σ	0.190936	0.148099	0.230882	0.138618	0.37899	0.306935	0.219703	0.299793
%CV	3.75899	2.4545	3.37358	1.78785	4.26658	3.06393	2.0388	2.14656	2.86135
NEB TRI Exon IV assay
Min	2.87	3.48	4.75	6.39	4.79	6.17	10.4	13.8
Max	5.72	7.14	6.56	7.38	9.05	10.9	10.55	16.1
Mean	4.34727	5.35841	5.78083	7.04333	7.862	8.64714	10.475	14.85
σ	0.586151	0.834213	0.555595	0.565892	1.76474	1.65519	0.106066	1.16297
%CV	13.4832	15.5683	9.61099	8.03443	22.4465	19.1415	1.01256	7.83145	12.1411
NEB TRI Exon VIII assay
Min	3.55	4.64	6.4	7.31	8.05	9.16	9.86	14.8
Max	5.6	8.09	9.35	8.52	10.2	11	11.35	16.65
Mean	4.82364	6.0467	6.995	7.90333	9.324	10.2686	10.605	15.45
σ	0.455292	0.667399	0.898531	0.605337	0.826123	0.744209	1.05359	1.04043
%CV	9.43877	11.0374	12.8453	7.65927	8.86018	7.24745	9.93483	6.73419	9.21968
