# Supplementary material for: A custom ddPCR method for the detection of copy number variations in the nebulin triplicate region
Source: PLoS One. 2022 May 16;17(5):e0267793. doi: 10.1371/journal.pone.0267793 (PMC9109913; doi:10.1371/journal.pone.0267793)
Supplement: S10 Table — (XLSX) [file pone.0267793.s010.xlsx]

## Sheet: Taul1
		NEB TRI exon IV
		aCGH																Assay Kappa	Value	ASE	Z	Pr(>|z|)	Confint lower	Confint upper
	CN	3	4	5	6	7	8	9	10	11	12	13	14	15	16			Unweighted	0.1201	0.05315	2.26	0.02383	0.0159396	0.224269
ddPCR	3	0	0	1	1	0	0	0	0	0	0	0	0	0	0			Weighted	0.5583	0.06081	9.181	4.284e-20	0.439113	0.677496
	4	0	0	14	6	0	0	0	0	0	0	0	0	0	0
	5	0	0	6	16	4	0	1	0	0	0	0	0	0	0
	6	0	0	1	16	7	1	0	2	0	0	0	0	0	0
	7	0	0	0	5	1	1	0	0	0	0	0	0	0	0
	8	0	0	0	0	0	1	2	0	0	0	0	0	0	0
	9	0	0	0	0	0	0	2	3	1	0	0	0	0	0
	10	0	0	0	0	0	0	0	1	0	0	0	0	0	0
	11	0	0	0	0	0	0	0	1	1	0	0	0	0	0
	12	0	0	0	0	0	0	0	0	0	0	0	0	0	0
	13	0	0	0	0	0	0	0	0	0	0	0	0	0	0
	14	0	0	0	0	0	0	0	0	0	0	0	1	0	0
	15	0	0	0	0	0	0	0	0	0	0	0	1	0	0
	16	0	0	0	0	0	0	0	0	0	0	0	1	0	0
	n	0	0	22	44	12	3	5	7	2	0	0	3	0	0	98
		NEB TRI exon VIII
		aCGH																Assay Kappa	Value	ASE	Z	Pr(>|z|)	Confint lower	Confint upper
		4	5	6	7	8	9	10	11	12	13	14	15	16	17			Unweighted	0.4675	0.05861	7.977	1.496e-15	0.352665	0.582407
ddPCR	4	0	4	0	0	0	0	0	0	0	0	0	0	0	0			Weighted	0.7781	0.0299	26.019	2.987e-149	0.719469	0.83669
	5	0	16	5	0	0	0	0	0	0	0	0	0	0	0
	6	0	2	29	3	0	0	0	0	0	0	0	0	0	0
	7	0	0	8	8	1	0	0	0	0	0	0	0	0	0
	8	0	0	2	0	1	1	0	0	0	0	0	0	0	0
	9	0	0	0	1	1	2	2	0	0	0	0	0	0	0
	10	0	0	0	0	0	2	1	1	0	0	0	0	0	0
	11	0	0	0	0	0	0	4	1	0	0	0	0	0	0
	12	0	0	0	0	0	0	0	0	0	0	0	0	0	0
	13	0	0	0	0	0	0	0	0	0	0	0	0	0	0
	14	0	0	0	0	0	0	0	0	0	0	0	0	0	0
	15	0	0	0	0	0	0	0	0	0	0	2	0	0	0
	16	0	0	0	0	0	0	0	0	0	0	0	0	0	0
	17	0	0	0	0	0	0	0	0	0	0	1	0	0	0
	n	0	22	44	12	3	5	7	2	0	0	3	0	0	0	98
